# Transcriptional Effects of E3 Ligase *Atrogin-1/MAFbx* on Apoptosis, Hypertrophy and Inflammation in Neonatal Rat Cardiomyocytes

Yong Zeng<sup>1\*</sup>, Hong-Xia Wang<sup>2</sup>, Shu-Bin Guo<sup>3</sup>, Hui Yang<sup>2</sup>, Xiang-Jun Zeng<sup>2</sup>, Quan Fang<sup>1</sup>, Chao-Shu Tang<sup>2</sup>, Jie Du<sup>4</sup>, Hui-Hua Li<sup>2\*</sup>

**1** Department of Cardiology, Peking Union Medical Hospital, Beijing, China, **2** The Key Laboratory of Remodeling-related Cardiovascular Diseases, Department of Pathology and Pathophysiology, School of Basic Medical Sciences, Capital Medical University, Beijing, China, **3** Department of Emergency Medicine, Peking Union Medical Hospital, Beijing, China, **4** The Key Laboratory of Remodeling-related Cardiovascular Diseases, Laboratory of Vascular Biology, Beijing Institute of Heart Lung and Blood Vessel Diseases, Beijing Anzhen Hospital Affiliated the Capital Medical University, Beijing, China

## Abstract

*Atrogin-1/MAFbx* is a ubiquitin E3 ligase that regulates myocardial structure and function through the ubiquitin-dependent protein modification. However, little is known about the effect of *atrogin-1* activation on the gene expression changes in cardiomyocytes. Neonatal rat cardiomyocytes were infected with adenovirus *atrogin-1* (Ad-*atrogin-1*) or GFP control (Ad-GFP) for 24 hours. The gene expression profiles were compared with microarray analysis. 314 genes were identified as differentially expressed by overexpression of *atrogin-1*, of which 222 were up-regulated and 92 were down-regulated. *Atrogin-1* overexpression significantly modulated the expression of genes in 30 main functional categories, most genes clustered around the regulation of cell death, proliferation, inflammation, metabolism and cardiomyocyte structure and function. Moreover, overexpression of *atrogin-1* significantly inhibited cardiomyocyte survival, hypertrophy and inflammation under basal condition or in response to lipopolysaccharide (LPS). In contrast, knockdown of *atrogin-1* by siRNA had opposite effects. The mechanisms underlying these effects were associated with inhibition of MAPK (ERK1/2, JNK1/2 and p38) and NF- $\kappa$ B signaling pathways. In conclusion, the present microarray analysis reveals previously unappreciated *atrogin-1* regulation of genes that could contribute to the effects of *atrogin-1* on cardiomyocyte survival, hypertrophy and inflammation in response to endotoxin, and may provide novel insight into how *atrogin-1* modulates the programming of cardiac muscle gene expression.

**Citation:** Zeng Y, Wang H-X, Guo S-B, Yang H, Zeng X-J, et al. (2013) Transcriptional Effects of E3 Ligase *Atrogin-1/MAFbx* on Apoptosis, Hypertrophy and Inflammation in Neonatal Rat Cardiomyocytes. PLoS ONE 8(1): e53831. doi:10.1371/journal.pone.0053831

**Editor:** Tianqing Peng, University of Western Ontario, Canada

**Received:** October 5, 2012; **Accepted:** December 3, 2012; **Published:** January 15, 2013

**Copyright:** © 2013 Zeng et al. This is an open-access article distributed under the terms of the Creative Commons Attribution License, which permits unrestricted use, distribution, and reproduction in any medium, provided the original author and source are credited.

**Funding:** This study was supported by grants from the China Natural Science Foundation (81025001, 30971097 and 30888004), the Beijing High-Level Talents Program (PHR20110507). The funders had no role in study design, data collection and analysis, decision to publish, or preparation of the manuscript.

**Competing Interests:** The authors have declared that no competing interests exist.

\* E-mail: zengyong1999@yahoo.com (YZ); hhli1935@yahoo.cn (HHL)

## Introduction

Heart failure (HF) is the final and common pathway for various cardiovascular diseases. Lipopolysaccharide (LPS) from gram negative bacteria is one of the most common causes of inflammation and innate immunity through Toll-like receptor-4 (TLR-4) [1,2]. Several studies demonstrated that LPS directly induces cardiomyocyte hypertrophy, apoptosis and depresses contractility, ultimately leading to cardiomyopathy and congestive heart failure [3]. Accumulating evidence has shown that cardiac muscle mass loss, because of increased rate of protein degradation and cellular death, represents a critical pathogenic event in HF [4]. Disturbances in the ubiquitin-proteasome system are thought to be involved in the development of various cardiovascular diseases, including HF, cardiac infarction and atherosclerosis [4–8]. Recently, a study has identified two novel ubiquitin E3 ligases, *atrogin-1/MAFbx* and *MuRF1*, which function as negative regulator of muscle cell size in vitro and in vivo [5,6,9–12].

*Atrogin-1* is an F-box protein selectively expressed in cardiac and skeletal muscle tissues, and is known to be up-regulated markedly

in skeletal muscle in a variety of models of catabolic states, including oxidative stress, fasting, cancer, sepsis, heart failure [8–10,13,14]. Importantly, *atrogin-1* associates with Skp1, Cull1 and Roc1 to form an SKP1-CUL1-F-box (SCF)-type ubiquitin ligase [5,6,10,15]. Overexpression of *atrogin-1* in skeletal myotubes leads to atrophy, whereas *atrogin-1* deficiency results in marked resistance to skeletal muscle denervation atrophy [10]. Moreover, *atrogin-1* confers SCF complex specificity by directly targeting many substrates including calcineurin, initiation factor eIF3-f, Myo D, and mitogen-activated protein kinase phosphatase-1 (MKP-1) for proteasome-dependent degradation, leading to negative regulation of muscle cell size and cardiomyocyte survival [5,16–19]. However, We have recently described a novel role for *atrogin-1* as a co-activator of FOXO1/3a through lysine 63-linked polyubiquitination, thereby inhibiting Akt-dependent physiologic hypertrophy [6]. These results suggest that *atrogin-1* plays a pivotal role in muscle atrophy, cardiac hypertrophy and cardiomyocyte apoptosis.

Although it is well known that upstream proteins including Foxo1/3a that activate *atrogin-1* transcription and enhance its

activity for protein degradation are required for heart failure [15,20,21], little is known about how *atrogin-1* contributes cardiomyocyte apoptosis, proliferation and hypertrophy through regulating gene expression at the transcriptional level. To gain insight into the early molecular events associated with *atrogin-1*-mediated cardiomyocyte apoptosis, hypertrophy and inflammation, we used primary neonatal rat cardiomyocytes as a model to investigate the effects of *atrogin-1* on cardiac muscle gene expression, and confirmed the results by real-time quantitative PCR analysis. Our results showed that *atrogin-1* overexpression modulated the expression of many genes involved in the regulation of diverse biological functions, including cell survival, proliferation, inflammation, cell metabolism and cardiac hypertrophy. Importantly, *atrogin-1* inhibits endotoxin LPS-induced cardiomyocyte apoptosis, hypertrophy and inflammation through mitogen activated protein kinases (MAPKs) and NF- $\kappa$ B signaling pathways. We believe that such a comprehensive analysis of gene expression profile in neonatal rat cardiomyocytes may identify novel targets for drug discovery in the intervention of the progression of cardiac dysfunction.

## Results

### Effects of *atrogin-1* overexpression on gene expression profiles in neonatal rat cardiomyocytes

To identify genes differentially regulated by *atrogin-1* in cardiomyocytes, we examined the changes in the gene expression profiles of cardiomyocytes infected by adenovirus *atrogin-1* (Ad-*atrogin-1*) and GFP control (Ad-GFP) using DNA microarray assay. After 24 hours, the infection efficiency was more than 95% as characterized by GFP, the level of *atrogin-1* protein in cardiomyocytes was increased by 2.8-fold compared to Ad-GFP control (Figure 1A and B). Moreover, we found that overexpression of *atrogin-1* in cultured cardiomyocytes leads to 314 genes being significantly regulated when compared to control group. Of them, 222 were up-regulated and 92 down-regulated by *atrogin-1* overexpression. A hierarchical clustering on the complete set of data of present genes was performed as described [22]. The analysis showed a clear separation of the Ad-GFP control (G) and overexpressed *atrogin-1* (A) groups, when a clustering was performed on a subset of genes that displayed different expression with fold changes  $\geq 2$ -fold or  $\leq -2$ -fold (Figure 1C).

### Validation of microarray analysis with qRT-PCR

To examine the reliability of microarray results, we performed qRT-PCR analysis for a set of eight genes including *Axin2*, *Cxcl6*, *Calr*, *IL-1r1*, *Cadm1*, *Cxcl1*, *Dkk2* and *IL-6*, which were differentially expressed in the microarray assay. Scatter plot analysis of the relative changes in expression as determined by qRT-PCR and microarray revealed a good correlation (Figure 2).

To validate the microarray data, we performed qRT-PCR for a set of 10 genes that were differentially expressed in *atrogin-1*-infected cardiomyocytes. 7 of 10 genes showed similar expression ratios between qRT-PCR data and microarray results. Overexpressed *atrogin-1* significantly induced the transcription of cell proliferation-related genes including the *Axin2*, *Calr* and *DKK2*, and down-regulated the transcriptional level of cardiac remodeling-related gene *MMP3*, adhesion-related gene *Cadm1* and chemotaxis-related genes including *Cxcl1*, *Cxcl6* and *IL-6* compared to Ad-GFP control (Figure 3A). In contrast, knockdown of *atrogin-1* by siRNA significantly decreased the transcriptional level of *Calr*, *Axin2* and *Ccnd2*, and up-regulated the transcriptional level of *Cadm1*, *Ccl20*, *Cxcl1*, *Cxcl2*, *Cxcl6* and *IL-6* compared to siRNA-control (Figure 3B). Collectively, these results

further provide evidence to support the validity and quality of the microarray data.

### Functional characterization of the *atrogin-1*-regulated genes

Next, we clustered *atrogin-1*-regulated genes into functional groups using gene annotation information from the Affymetrix database. Our data showed that the most prominently enriched biological process in the differentially *atrogin-1*-regulated genes was cell apoptosis, proliferation, metabolism, hypertrophy and inflammation.

#### Genes involved in cell apoptosis

Twenty-two genes were differentially regulated by *atrogin-1* overexpression (Table 1). Eight of them including *Csf2* [23–25], *IL-6* [26–28] and *Aldh1a3* [29] were down-regulated, which were involved in negative regulation of apoptosis. Conversely, fourteen of them including *Msx2* [30] and *Axin2* [31] were up-regulated, which mediated positive regulation of apoptosis.

#### Genes involved in cell proliferation

One of the most significant overrepresented terms of biological process was cell proliferation in Ad-*atrogin-1* group compared to Ad-GFP control group. Eighteen genes were differentially regulated, which are involved in cell proliferation (Table 2). Of them, thirteen genes such as *Ptgs2* [32] were down-regulated, which mediated positive regulation of cell proliferation. In contrast, seven genes such as *Axin2* [31], *Msx2* [30] and *Prkcz* (PKC $\epsilon$ ) [33] involved in negative regulation of cell proliferation and cell cycle arrest were up-regulated.

#### Genes involved in metabolisms

Metabolic pathways was a crucial signaling pathway through which sixteen genes were significantly enriched (Table 3). Twelve genes such as *Ptgs1* [34] and *Pycr1* [35] were up-regulated. Conversely, four genes including *Ckmt1* and *Ptges* were down-regulated, which mediates negative regulation of mitochondrial function [36].

#### Genes involved in cell development and hypertrophic cardiomyopathy

Seventeen genes were closely related to the regulation of cell development (Table 4). Thirteen of them such as *Myh6* ( $\alpha$ -MHC) [37], *Bhlha15* (*Mist1*) [38] and *Serca2* (*ATP2A2*) [39,40] and *Prkcz* that are involved in cell maturation, sarcomere organization and hypertrophy were up-regulated. Four of them such as *Foxa2* [41] and *ITGA3* were down-regulated, which mediate regulation of gene expression in response to insulin stimulus and cell differentiation.

#### Genes involved in inflammation

Response to inflammation and stress was a prominently overrepresented GO term in which thirty-five genes were involved (Table 5), nineteen of them involved in inflammatory response were significantly down-regulated by overexpression of *atrogin-1*, these genes include *IL-6* [42], *Ptger3* [43], *Lbp* [44], *Ptgs2* (*Cox-2*) [45] and chemokines such as *Cxcl1*, *Cxcl2*, *Cxcl3*, *Ccl20* and *Cxcl6* [46,47]. However, sixteen of them such as *IL-1r1* was significantly up-regulated [48].

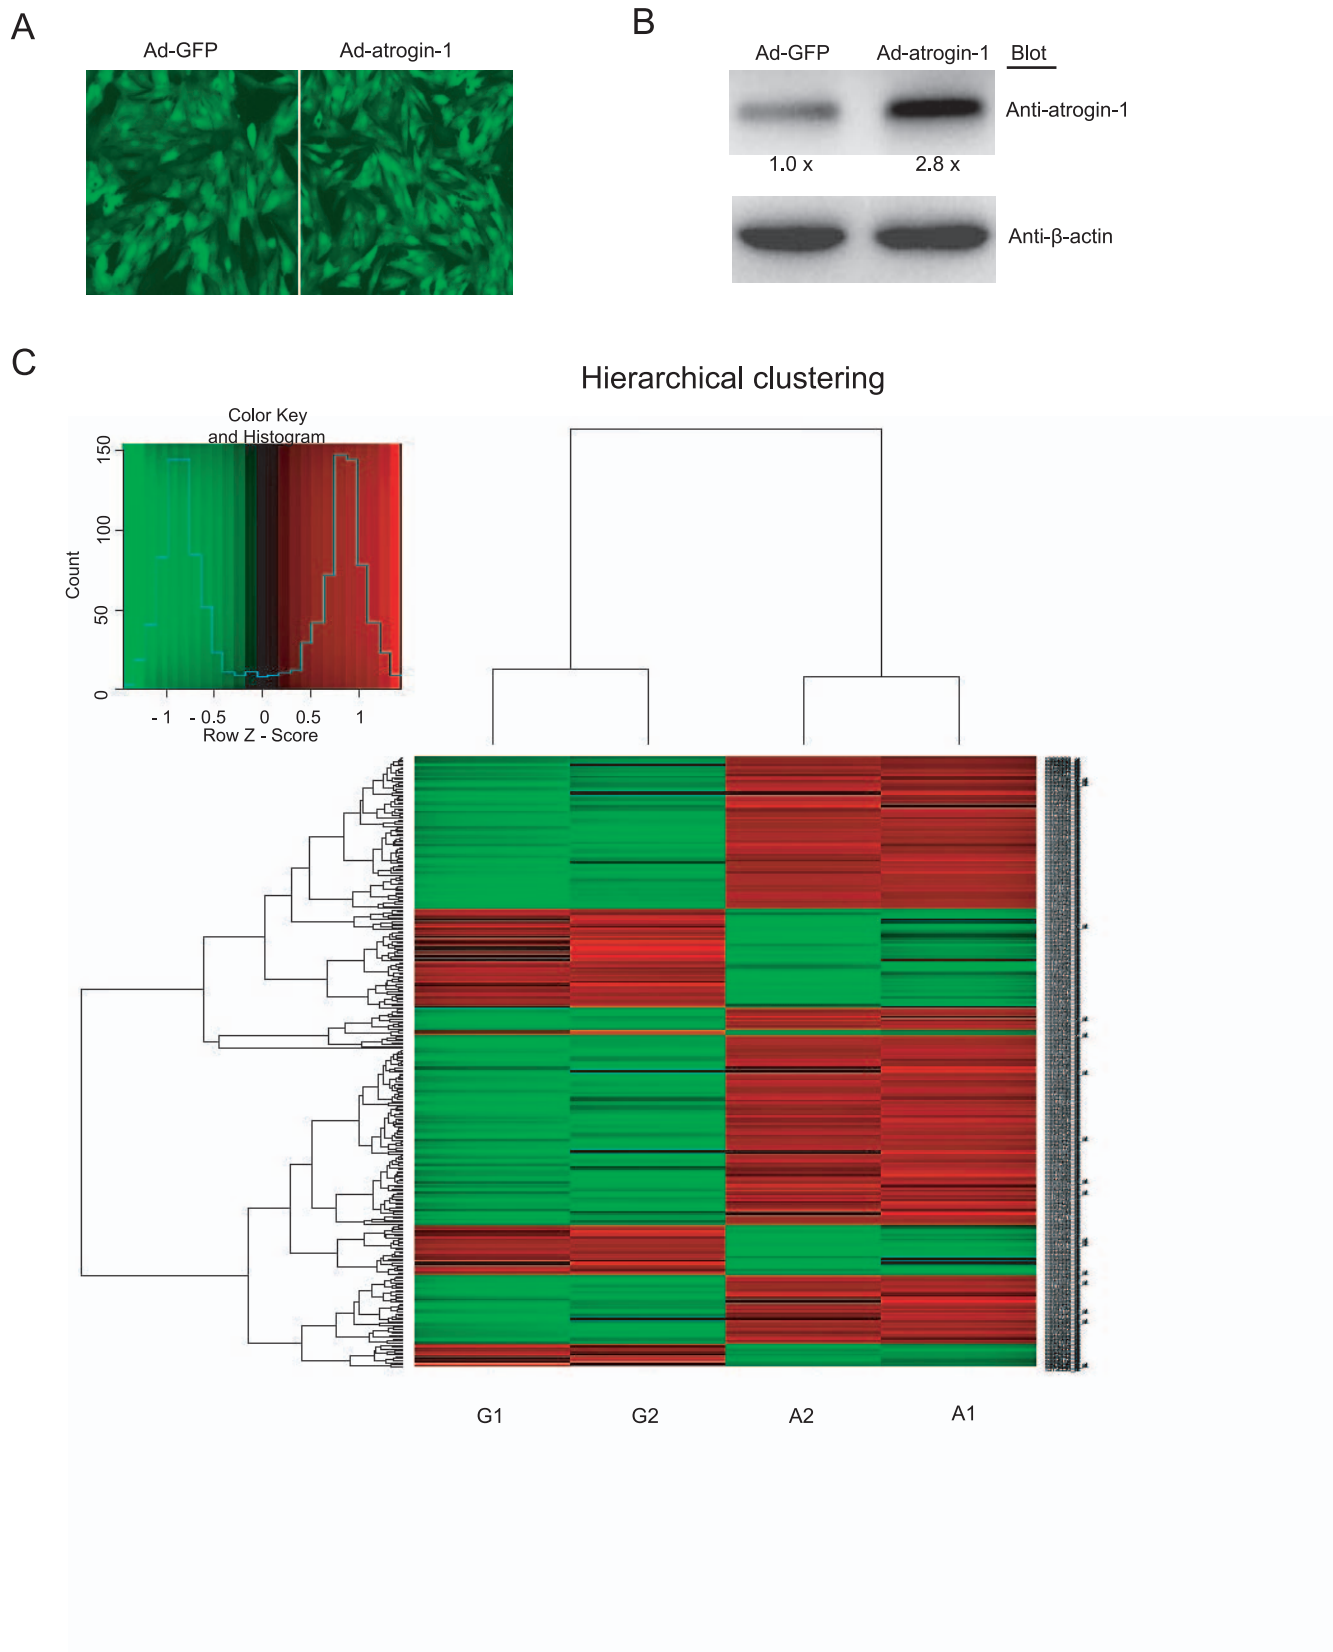

**Figure 1. Infection of adenovirus *atrogin-1* and microarray analysis.** **A.** Neonatal rat cardiomyocytes were infected with adenovirus green fluorescent protein (GFP) control (Ad-GFP) or *atrogin-1* (Ad-*atrogin-1*). The infection efficiency was visualized for GFP 24 hours later using fluorescence microscopy (Magnification,  $\times 400$ ). **B.** The levels of *atrogin-1* protein were determined by Western blot analysis with anti-*atrogin-1* antibody, using  $\beta$ -actin as the internal control. Quantitative analysis of protein bands was shown ( $n = 3$ ). **C.** Hierarchical clustering depicting expression profiles of

differentially expressed genes in Ad-*atrogin-1* (A1 and A2) and Ad-control (G1 and G2) groups. Data from individual sample are shown. A subset of genes displays significant expression changes at  $\geq 2$ -fold or  $\leq -2$ -fold. Gene expression levels are shown as color variations (red: up-regulated expression; green: down-regulated expression). doi:10.1371/journal.pone.0053831.g001

### Effects of *atrogin-1* on cardiomyocyte apoptosis, hypertrophy and inflammation

Since genes differentially regulated by *atrogin-1* in cardiomyocytes have been implicated in cell apoptosis, hypertrophy and inflammation (Table 1, 4 and 5), which cause cardiac dysfunction and ultimately lead to heart failure, we then investigated whether overexpression of *atrogin-1* influences cardiomyocyte apoptosis. Consistent with previous reports [18], *atrogin-1* overexpression significantly increased TUNEL-positive cardiomyocytes compared to Ad-GFP control (Figure 4A). After LPS stimulation, TUNEL-positive cardiomyocytes were significantly increased, and this effect was further enhanced by Ad-*atrogin-1* infection (Figure 4A). Moreover, consistent with our previous reports [5,6,49], *atrogin-1* overexpression markedly reduced cardiomyocyte surface areas under basal condition and in response to LPS stimulation (Figure 4B). qPCR analysis of hypertrophic markers (ANF,  $\alpha$ -MHC and Serca2) further confirmed the effect of *atrogin-1* on cardiomyocyte hypertrophy (Figure 4C). In contrast, knockdown of *atrogin-1* by siRNA significantly reversed these effects under basal condition or in response to LPS (Figure 4D and E). Finally, *atrogin-1* overexpression markedly inhibited the expression of pro-inflammatory-related genes (including IL-1 $\beta$ , IL-6, Ptg2 and Serpinb2) and chemokines (Cxcl1, Cxcl2 and Ccl20) but up-regulated anti-inflammatory gene IL-1r1 expression compared to Ad-GFP control under basal condition or in response to LPS stimulation (Figure 5A), whereas these effects were reversed by knockdown of *atrogin-1* (Figure 5B). These results further confirmed the data from microarray analysis (Table 5). Collectively, these results indicate that increased expression of *atrogin-1*

inhibits cardiomyocyte survival, hypertrophy and inflammation under basal condition or in response to LPS stimulation.

### Effects of *atrogin-1* on MAPKs and NF- $\kappa$ B signaling pathways

To elucidate the mechanisms for *atrogin-1* to regulate transcriptional gene expression, we examined the activation of two major signaling pathways of MAPK and NF- $\kappa$ B, which play critical roles in controlling the expression of apoptosis-, hypertrophy- and inflammation-related genes [50]. Our results showed that under saline treatment, overexpression of *atrogin-1* decreased the levels of ERK1/2, JNK1/2, p38 and p-65 phosphorylation protein compared to Ad-GFP control (Figure 6A). After LPS stimulation, the levels of ERK1/2, JNK1/2, p38 and p-65 phosphorylation were significantly increased compared to Ad-GFP control. However, LPS-induced effects were markedly attenuated by overexpression of *atrogin-1* in cardiomyocytes (Figure 5A). In contrast, depletion of *atrogin-1* by siRNA had opposite effects (Figure 6B). Together, these results suggest that MAPKs and NF- $\kappa$ B signaling pathways could be attributed to the effects of *atrogin-1* in cardiomyocytes under basal condition or after LPS treatment.

### Discussion

The present results demonstrate that *atrogin-1* activation results in the differential regulation of 314 genes in neonatal rat cardiomyocytes, of which 222 were up-regulated and 92 were down-regulated. Interestingly, the majority of differentially and highly expressed genes were involved in cell death, proliferation, inflammation, metabolism and cardiomyopathy. Moreover, in-

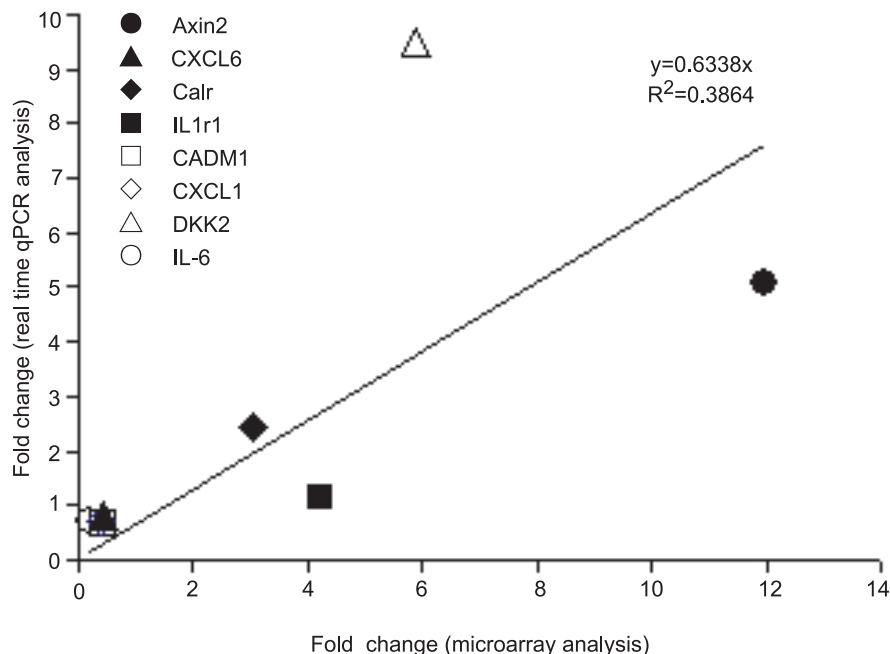

**Figure 2. Scatter plot of relative changes in gene expression as determined by microarray analysis and by qRT-PCR.** Eight genes were analyzed: IL-6, DKK2, Calr, Cxcl6, Cxcl1, Axin2, IL-1r1, and Cadm1. Each symbol represents the fold change of the respective gene in ad-*atrogin-1* group over Ad-GFP control. doi:10.1371/journal.pone.0053831.g002

A

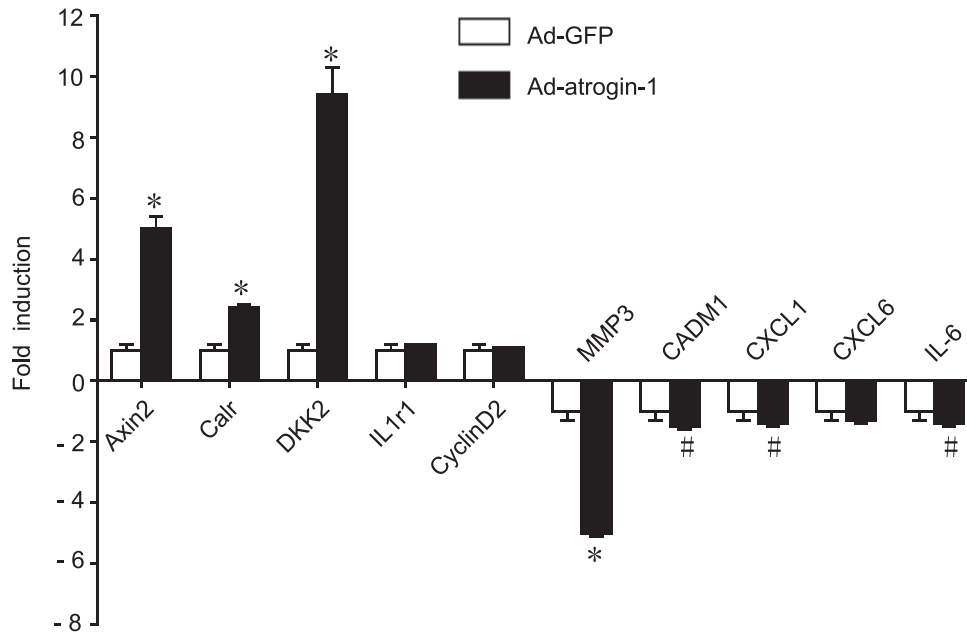

B

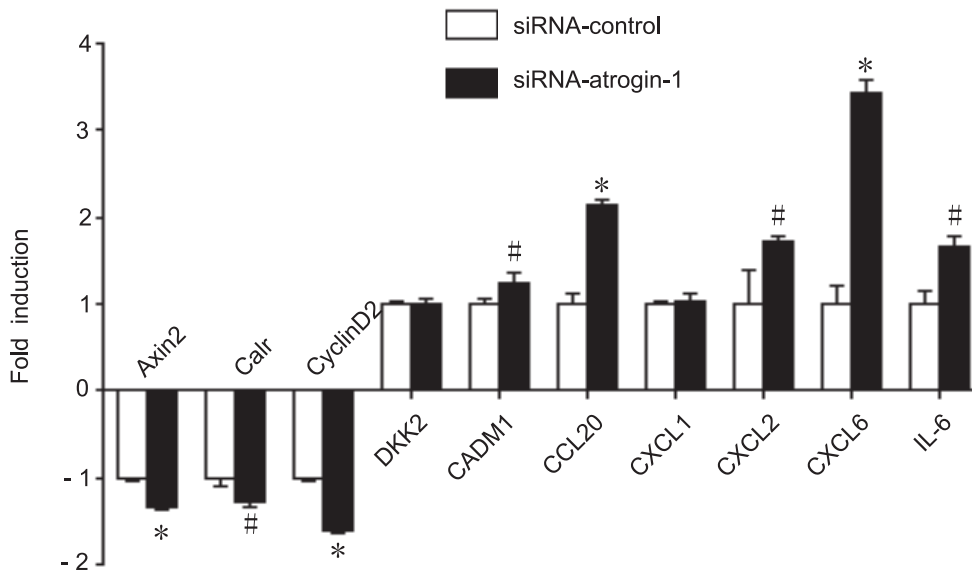

**Figure 3. qRT-PCR analysis of microarray data.** Neonatal rat cardiomyocytes were infected with Ad-*atrogin-1* or Ad-GFP (A), Ad-siRNA-*atrogin-1* or Ad-siRNA-control (B) for 24 hours. Total RNA was extracted and qRT-PCR analysis was performed in triplicate using specific oligonucleotide primers. The differences in gene expression levels were statistically significant. Data represent the mean  $\pm$  SEM (n = 3 per group). # $P$ <0.05; \* $P$ <0.001 vs. Ad-GFP control.

doi:10.1371/journal.pone.0053831.g003

creased expression of *atrogin-1* significantly inhibited cardiomyocyte survival, hypertrophy and inflammation under basal condition or in response to LPS stimulation. The mechanisms underlying these effects were associated with inhibition of MAPK (ERK1/2, JNK1/2 and p38) and NF- $\kappa$ B signaling pathways.

Emerging evidences suggest that *atrogin-1* is a muscle-specific E3 ligase and is up-regulated by various of catabolic conditions [8–10,12,51]. Recent studies demonstrate that TNF- $\alpha$ , doxorubicin

(DOX) and LPS can stimulate *atrogin-1* mRNA expression and ubiquitin conjugating activity in skeletal muscle through activation of p38 MAPK [51–53]. In contrast, AKT activation decreases *atrogin-1* expression through inhibition of FoxO transcriptional factors [54]. In addition, *atrogin-1* protein is degraded by proteasome via p38 MAPK signaling pathway [55]. These data indicate that multiple signaling pathways regulate *atrogin-1* expression at different levels.

**Table 1.** GO:0008219 cell apoptosis and death.

| Gene Symbol | Gene Title                                                                       | Fold change | P value |
|-------------|----------------------------------------------------------------------------------|-------------|---------|
| Rab27a      | RAB27A, member RAS oncogene family                                               | 5.69        | 0.0011  |
| Prkcz       | protein kinase C, zeta                                                           | 3.66        | 4.0E-05 |
| Msx2        | msh homeobox 2                                                                   | 3.59        | 0.027   |
| Herpud1     | homocysteine-inducible, endoplasmic reticulum stress-inducible, ubiquitin-like d | 3.47        | 5.7E-05 |
| Dnajb9      | DnaJ (Hsp40) homolog, subfamily B, member 9                                      | 3.27        | 6.1E-05 |
| Hspa5       | heat shock protein 5                                                             | 3.19        | 2.8E-04 |
| Tcf7        | transcription factor 7, T-cell specific                                          | 2.82        | 0.0017  |
| Pdia3       | protein disulfide isomerase family A, member 3                                   | 2.69        | 1.3E-05 |
| Pdia2       | protein disulfide isomerase famil                                                | 2.33        | 0.0039  |
| Sels        | selenoprotein 5                                                                  | 2.29        | 1.5E-04 |
| Eif2ak3     | eukaryotic translation initiation factor 2 alpha kinase 3                        | 2.14        | 3.1E-04 |
| Gclc        | glutamate-cysteine ligase, catalytic subunit                                     | 2.05        | 0.018   |
| Psen2       | presenilin 2                                                                     | -2.02       | 7.8E-04 |
| Aldh1a3     | aldehyde dehydrogenase 1 family, member A3                                       | -2.04       | 0.05    |
| Mapt        | microtubule-associated protein tau                                               | -2.17       | 0.027   |
| Cadm1       | cell adhesion molecule 1                                                         | -2.34       | 0.0026  |
| Ptgs2       | prostaglandin-endoperoxide synthase 2                                            | -3.56       | 0.020   |
| Csf2        | colony stimulating factor 2 (granulocyte-macrophage)                             | -3.78       | 0.042   |
| Il-6        | interleukin 6                                                                    | -4.83       | 0.006   |

doi:10.1371/journal.pone.0053831.t001

Apoptotic cell death in cardiac myocytes appears to be an early event and is well recognized to be responsible for several cardiovascular diseases such as HF and myocardial infarction [56]. LPS, one of the most common causes of inflammation, directly induces cardiomyocyte apoptosis and hypertrophy through calcineurin signaling pathway [3,49,51]. However, it is unclear that whether *atrogin-1* contributes to LPS-induced cardiomyocyte apoptosis. Recently, our data show that *atrogin-1* plays an important role in regulating cardiomyocyte apoptosis.

Overexpression of *atrogin-1* promotes ischemia/reperfusion (I/R)-induced cardiomyocyte apoptosis through activation of JNK signaling pathway [18]. However, the mechanisms by which *atrogin-1* promotes cardiomyocyte apoptosis remain to be elucidated. In this study, we examined the gene expression profiling regulated by *atrogin-1* overexpression in cardiomyocytes. Our microarray data showed that many genes involved in cell apoptosis and proliferation, including *Csf2*, *IL-6*, *Ptgs2*, *Aldh1a3*, *Axin2*, *Msx2*, *Prkcz*, *Calr*, and *Pdia3* were differentially regulated (Table 1

**Table 2.** GO:0008283 cell proliferation.

| Gene Symbol | Gene Title                                                                   | Fold change | P value |
|-------------|------------------------------------------------------------------------------|-------------|---------|
| Axin2       | axin2                                                                        | 12.2        | 6.6E-06 |
| Prkcz       | protein kinase C, zeta                                                       | 3.66        | 4.0E-05 |
| Msx2        | msh homeobox 2                                                               | 3.59        | 0.027   |
| Abcc4       | ATP-binding cassette, sub-family C (CFTR/MRP), member 4                      | 3.20        | 1.3E-04 |
| Calr        | calreticulin                                                                 | 3.05        | 1.2E-04 |
| Mycn        | v-myc myelocytomatosis viral related oncogene, neuroblastoma derived (avian) | 2.85        | 1.5E-04 |
| Tcf7        | transcription factor 7, T-cell specific                                      | 2.82        | 0.0017  |
| Fgf9        | fibroblast growth factor 9                                                   | 2.42        | 0.0038  |
| Ccnd2       | cyclin D2                                                                    | 2.21        | 0.0067  |
| Cdk5rap3    | CDK5 regulatory subunit associated protein 3                                 | 2.03        | 0.0021  |
| Klf5        | Kruppel-like factor 5                                                        | -2.17       | 0.013   |
| Cadm1       | cell adhesion molecule 1                                                     | -2.34       | 0.0026  |
| Ptges       | prostaglandin E synthase                                                     | -3.21       | 0.05    |
| Ptgs2       | prostaglandin-endoperoxide synthase 2                                        | -3.56       | 0.020   |
| Csf2        | colony stimulating factor 2 (granulocyte-macrophage)                         | -3.78       | 0.04    |

doi:10.1371/journal.pone.0053831.t002

**Table 3.** Metabolic pathways.

| Gene Symbol | Gene Title                                                        | Fold change | P value |
|-------------|-------------------------------------------------------------------|-------------|---------|
| Isyna1      | inositol-3-phosphate synthase 1                                   | 4.09        | 3.8E-05 |
| Gmppb       | GDP-mannose pyrophosphorylase B                                   | 3.62        | 2.6E-06 |
| Pycr1       | pyrroline-5-carboxylate reductase 1                               | 3.15        | 0.004   |
| LOC684425   | similar to Adenylosuccinate synthetase isozyme 1                  | 2.57        | 0.05    |
| Alg12       | asparagine-linked glycosylation 12 homolog                        | 2.27        | 4.4E-05 |
| Nans        | N-acetylneuraminic acid synthase                                  | 2.26        | 2.2E-04 |
| Oat         | ornithine aminotransferase (gyrate atrophy)                       | 2.25        | 3.8E-04 |
| Rpn1        | ribophorin I                                                      | 2.13        | 7.5E-06 |
| Slc33a1     | Solute carrier family 33                                          | 2.09        | 5.9E-04 |
| Stt3a       | STT3, subunit of the oligosaccharyltransferase complex, homolog A | 2.07        | 0.002   |
| Gclc        | glutamate-cysteine ligase, catalytic subunit                      | 2.05        | 0.018   |
| Bcat2       | branched chain aminotransferase 2, mitochondrial                  | 2.01        | 0.004   |
| Aldh1a3     | aldehyde dehydrogenase 1 family, member A3                        | -2.04       | 0.05    |
| Ptgis       | prostaglandin I2 (prostacyclin) synthase                          | -2.10       | 0.016   |
| Ptges       | prostaglandin E synthase                                          | -3.21       | 0.05    |
| Ckmt1       | creatine kinase, mitochondrial 1, ubiquitous                      | -3.35       | 0.0035  |
| Ptgs2       | prostaglandin-endoperoxide synthase 2                             | -3.56       | 0.02    |

doi:10.1371/journal.pone.0053831.t003

and 2). Csf2 has been known to exert anti-apoptotic activity through the expression of Bcl-2 family proteins in neural progenitor cells via JAK/STAT5-Bcl-2 pathway [23]. Csf2 also abrogates ischemia and thus prevents cardiomyocyte death by neovascularization [24]. IL-6 activates JAK/STAT3 and phosphatidylinositol 3-kinase (PI3K) pathways, thereby promoting cardiomyocyte survival [27,28]. Conversely, Axin2, Msx2, Calr and PKC $\epsilon$  that mediate inhibition of cell proliferation and survival were up-regulated. Axin2, a most highly up-regulated gene (12.17-fold), is a negative regulator of the Wnt signaling pathway that promotes the phosphorylation and degradation of  $\beta$ -catenin,

resulting in cardiomyocyte survival and hypertrophy [31,57]. PKC $\epsilon$  can phosphorylate insulin receptor substrates (IRS) on serine residues impairing activation of PI3K in response to insulin [33,58]. Loss of PKC $\epsilon$  selectively impairs signaling through the B-cell receptor, resulting in inhibition of cell proliferation and survival, as well as defects in the activation of ERK and the transcription of NF- $\kappa$ B-dependent genes [59]. Consistent with these data, our results showed that increased expression of *atrogin-1* significantly promoted cardiomyocyte apoptosis under basal condition or in response to LPS stimulation (Figure 4).

**Table 4.** GO:0048468 cell development and hypertrophy.

| Gene Symbol | Gene Title                                                | Fold change | P value |
|-------------|-----------------------------------------------------------|-------------|---------|
| Krt19       | keratin 19                                                | 13.9        | 0.0035  |
| Bhlha15     | basic helix-loop-helix family, member a15                 | 4.27        | 1.1E-04 |
| Calr        | calreticulin                                              | 3.05        | 1.2E-04 |
| Lef1        | lymphoid enhancer binding factor 1                        | 2.98        | 1.7E-04 |
| Csrp2       | cysteine and glycine-rich protein 2                       | 2.36        | 0.0021  |
| Ccnd2       | cyclin D2                                                 | 2.21        | 0.0067  |
| Eif2ak3     | eukaryotic translation initiation factor 2 alpha kinase 3 | 2.14        | 3.1E-04 |
| Hook1       | hook homolog 1 (Drosophila)                               | 2.13        | 6.3E-04 |
| Xbp1        | X-box binding protein 1                                   | 2.07        | 4.1E-05 |
| Lppr4       | plasticity related gene 1                                 | 2.05        | 0.018   |
| Cdk5rap3    | CDK5 regulatory subunit associated protein 3              | 2.03        | 0.0021  |
| Myh6        | myosin, heavy chain 6, cardiac muscle, alpha              | 2.02        | 0.05    |
| Mapt        | microtubule-associated protein tau                        | -2.17       | 0.027   |
| Itga3       | Integrin alpha 3                                          | -2.18       | 1.6E-05 |
| Foxa2       | forkhead box A2                                           | -5.28       | 2.0E-05 |

doi:10.1371/journal.pone.0053831.t004

**Table 5.** GO:0006950 response to inflammation.

| Gene Symbol | Gene Title                                                                       | Fold change | P value |
|-------------|----------------------------------------------------------------------------------|-------------|---------|
| Dnajc3      | DnaJ (Hsp40) homolog, subfamily C, member 3                                      | 6.77        | 4.2E-05 |
| Rab27a      | Similar to RIKEN cDNA 1110059E24                                                 | 5.69        | 0.0011  |
| Hyou1       | hypoxia up-regulated 1                                                           | 5.48        | 5.7E-06 |
| Il1r1       | interleukin 1 receptor, type I                                                   | 4.16        | 0.001   |
| Armet       | arginine-rich, mutated in early stage tumors                                     | 3.81        | 1.1E-04 |
| Herpud1     | homocysteine-inducible, endoplasmic reticulum stress-inducible, ubiquitin-like d | 3.46        | 5.7E-05 |
| Dnajb9      | DnaJ (Hsp40) homolog, subfamily B, member 9                                      | 3.27        | 6.1E-05 |
| Hspa5       | heat shock protein 5                                                             | 3.19        | 2.8E-04 |
| Pdia2       | protein disulfide isomerase famil                                                | 2.33        | 0.004   |
| Sels        | selenoprotein S                                                                  | 2.29        | 1.5E-04 |
| Eif2ak3     | eukaryotic translation initiation factor 2 alpha kinase 3                        | 2.15        | 3.1E-04 |
| Hspb7       | heat shock protein family, member 7 (cardiovascular)                             | 2.12        | 3.8E-04 |
| Xbp1        | X-box binding protein 1                                                          | 2.07        | 4.1E-05 |
| Gclc        | glutamate-cysteine ligase, catalytic subunit                                     | 2.05        | 0.018   |
| Txndc4      | thioredoxin domain containing 4 (endoplasmic reticulum)                          | 2.03        | 7.4E-05 |
| Serp1       | stress-associated endoplasmic reticulum protein 1                                | 2.02        | 0.0019  |
| Psen2       | presenilin 2                                                                     | -2.03       | 7.8E-04 |
| Lbp         | lipopolysaccharide binding protein                                               | -2.10       | 0.05    |
| Ptgis       | prostaglandin I2 (prostacyclin) synthase                                         | -2.10       | 0.016   |
| Cxcl3       | chemokine (C-X-C motif) ligand 3                                                 | -2.13       | 0.05    |
| Asf1a       | ASF1 anti-silencing function 1 homolog A ( <i>S. cerevisiae</i> )                | -2.18       | 4.0E-4  |
| Cxcl6       | chemokine (C-X-C motif) ligand 6                                                 | -2.25       | 0.045   |
| Ptges       | prostaglandin E synthase                                                         | -2.25       | 0.05    |
| Cadm1       | cell adhesion molecule 1                                                         | -2.34       | 0.0026  |
| Tfpi2       | tissue factor pathway inhibitor 2                                                | -2.37       | 0.05    |
| Hpx         | hemopexin                                                                        | -2.45       | 0.02    |
| Ptger3      | Prostaglandin E receptor 3 (subtype EP3)                                         | -2.50       | 0.016   |
| Cxcl1       | chemokine (C-X-C motif) ligand 1                                                 | -2.50       | 0.016   |
| Cxcl2       | chemokine (C-X-C motif) ligand 2                                                 | -2.60       | 0.05    |
| Reg3g       | regenerating islet-derived 3 gamma                                               | -2.60       | 0.05    |
| Ccl20       | chemokine (C-C motif) ligand 20                                                  | -3.17       | 0.006   |
| Ptgs2       | prostaglandin-endoperoxide synthase 2                                            | -3.56       | 0.02    |
| Il-6        | interleukin 6                                                                    | -4.83       | 0.006   |
| Serpib2     | serine (or cysteine) peptidase inhibitor, clade B, member 2                      | -5.45       | 0.017   |

doi:10.1371/journal.pone.0053831.t005

Hypertrophy is a major contributor to cardiac dysfunction in human. Alterations of cardiac gene expression are central to ventricular dysfunction in human HF [5]. Our previous studies and others have demonstrated that *atrogin-1* plays a crucial role in skeletal and cardiac muscle plasticity in response to hypertrophic or atrophic stimuli [5,6,10,18]. Accumulating evidences indicate that *atrogin-1*-dependent proteolysis of its substrates such as calcineurin, FOXOs, MyoD and eIF3-f could constitute the important events to regulate myocyte growth and hypertrophy [5,6,17,19]. However, the detailed molecular mechanisms by which *atrogin-1* contributes to hypertrophy via transcription remain to be elucidated. The present results showed that many genes significantly altered in cell development and hypertrophic cardiomyopathy by overexpressed *atrogin-1*, Myh6, Serca2 (ATP2A2) and Prkcz were significantly up-regulated, whereas Itga3 (also known as CD49c) and Foxa2 were down-

regulated.(Table 4). With respect to hypertrophic cardiomyopathy, Serca2 and Myh6 are major determinants of both cardiac relaxation and contraction. The Serca2 is of central importance for refilling of the sarcoplasmic reticulum (SR) Ca<sup>2+</sup> store and cardiac contractility. Deletion of Serca2 function is associated with HF in animal models [39], whereas lentivirus vector-mediated Serca2 gene transfer ameliorates HF induced by myocardial infarction in rat [40]. In the heart, two isoforms of myosin heavy chain (MHC), Myh6 (also known as  $\alpha$ -MHC) and Myh7 (also known as  $\beta$ -MHC), exist in the mammalian ventricular myocardium, and  $\alpha$ -MHC is highly expressed in adult cardiomyocytes, whereas  $\beta$ -MHC is expressed in embryonic cardiomyocytes. Cardiac stress triggers adult hearts to undergo hypertrophy and a shift from Myh6 to fetal Myh7 expression. Furthermore, LPS is known to directly induce cardiomyocyte hypertrophy through activation of calcineurin signaling pathway [49], whereas overex-



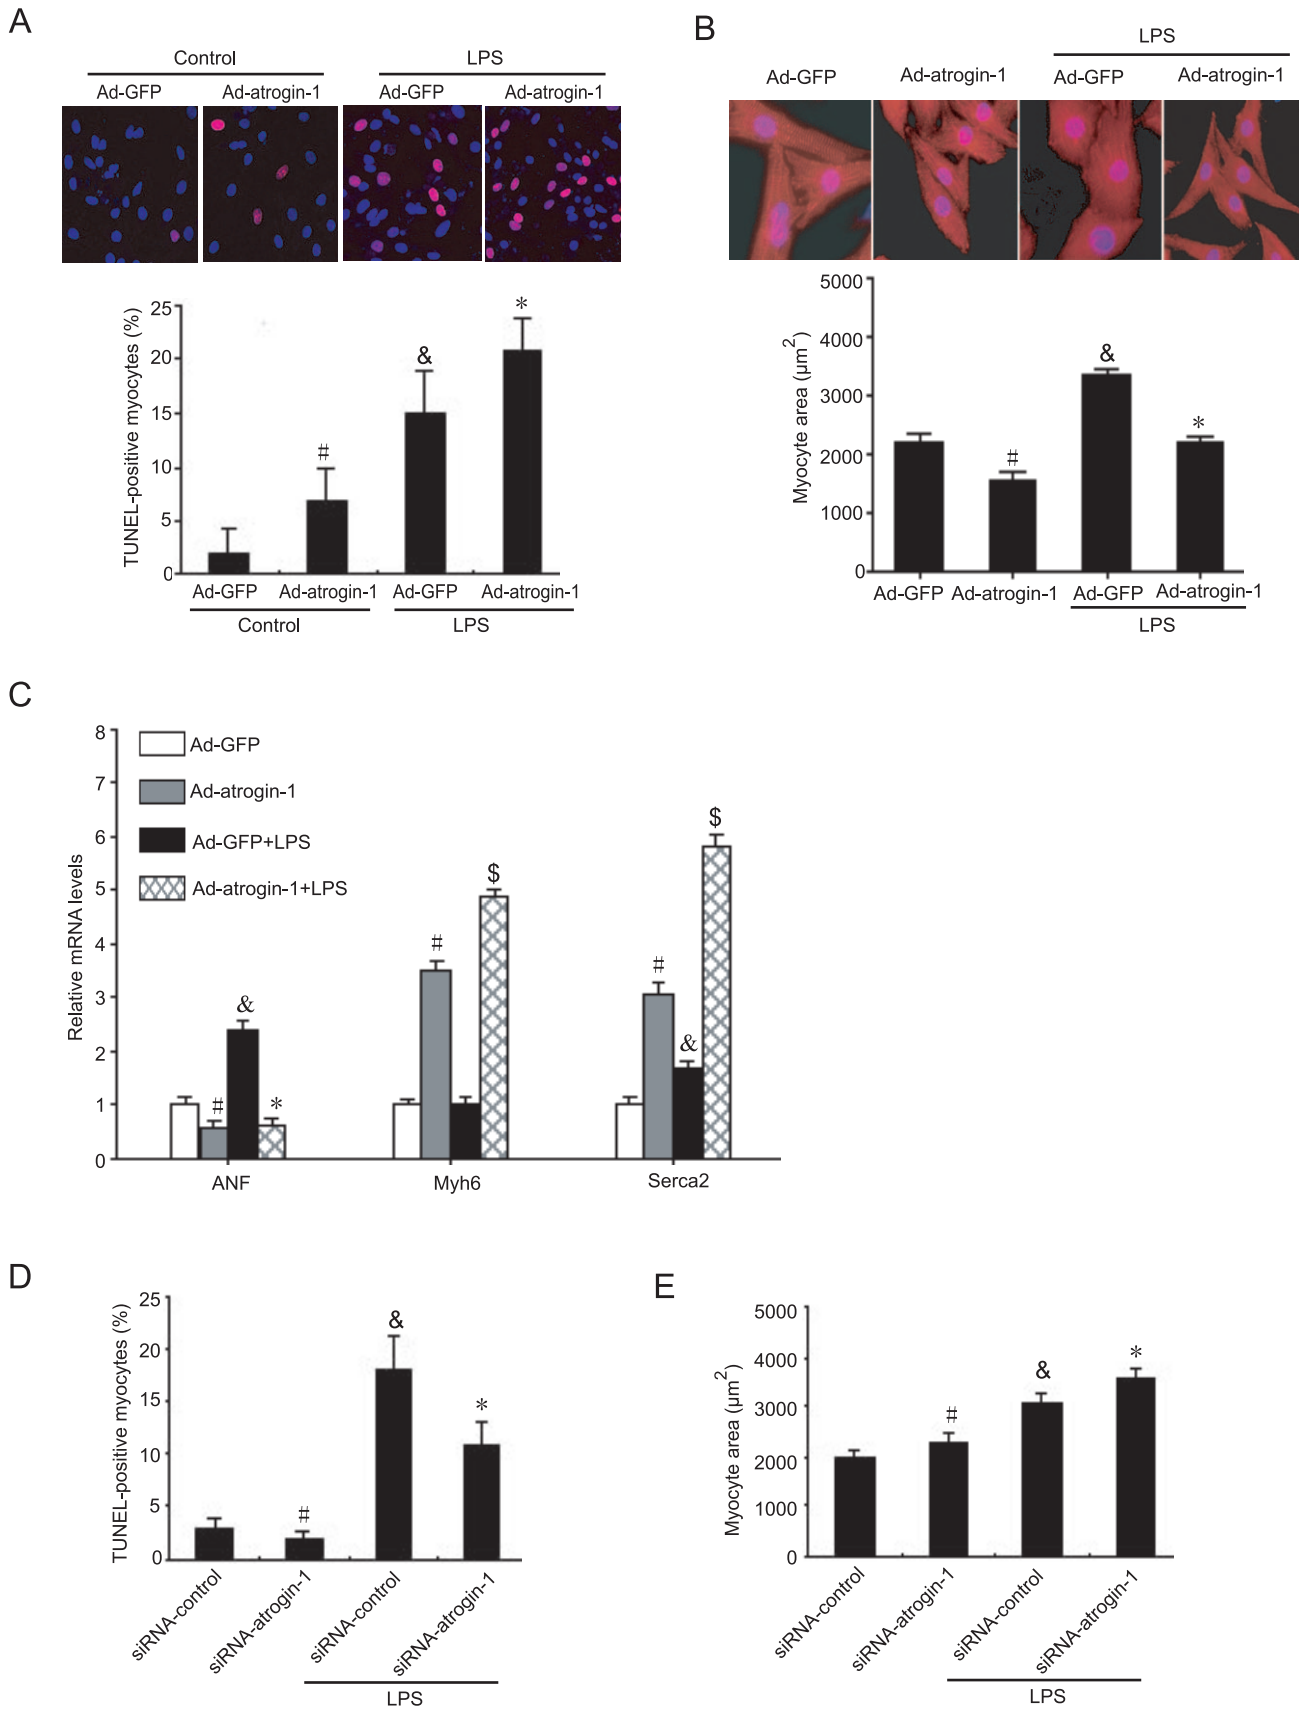

**Figure 4. Effects of *atrogin-1* overexpression on cardiomyocyte apoptosis and hypertrophy.** Neonatal rat cardiomyocytes were infected with Ad-GFP or Ad-*atrogin-1*-GFP for 24 h and then treated with LPS (1  $\mu\text{g}/\text{ml}$ ) for additional 24 hours. **A.** Apoptosis was detected and quantified using TUNEL assay (red), and nuclei were counterstained with DAPI (blue). A representative field is shown for each condition (top panels),

Magnification,  $\times 400$ . Quantitative analysis of TUNEL-positive cells from three independent experiments (bottom panels). **B.** The cells were fixed and stained with anti- $\alpha$ -actinin antibody followed by Alexa Fluor 568-conjugated goat anti-mouse IgG (red), and nuclei were stained with DAPI (blue). A representative field is shown for each condition (top panels), Magnification,  $\times 200$ . Quantitative analysis of cell surface area (a minimum of 100 randomly chosen cells measured in each group) (bottom panels). Data represent the mean  $\pm$  SEM (n=3).  $^{\#}P<0.05$ ,  $^{\&}P<0.01$  vs. Ad-GFP;  $^*P<0.05$ ;  $^{\$}P<0.01$  vs. Ad-GFP+LPS. **C.** The qRT-PCR analysis of ANF, Myh6 and *serca2* mRNA expression was performed in triplicate using specific oligonucleotides primers. **D** and **E.** Neonatal rat cardiomyocytes were infected with Ad-siRNA-*atrogin-1* or Ad-siRNA-control for 24 hours. Analysis of apoptosis and cell surface area were performed as in A and B. Data represent the mean  $\pm$  SEM (n=3).  $^{\#}P<0.05$ ,  $^{\&}P<0.01$  vs. siRNA-control;  $^*P<0.05$  vs. siRNA-control +LPS.  
doi:10.1371/journal.pone.0053831.g004

pression of *atrogin-1* promotes calcineurin degradation and inhibits its activity, resulting in inhibition of cardiac hypertrophy [5]. Consistent with our previous data [5,6], the present study showed that overexpression of *atrogin-1* inhibits LPS-induced cardiomyocyte hypertrophy, decreased the expression of hypertrophic marker ANF and up-regulated the level of Myh6 expression in cardiomyocytes. Thus, these results further confirmed that *atrogin-1* exerts an important role in controlling cardiomyocyte hypertrophy.

Functional annotation of the *atrogin-1*-infected cardiomyocyte signature analysis led us to three main pathways: metabolic pathways, inflammation signaling pathways and hypertrophic cardiomyopathy. There is a substantial body of work linking metabolic and inflammatory pathways with cardiovascular diseases including hypertrophy and HF [60,61]. Changes in mitochondrial gene expression were evident, ranging from the up-regulation of genes involved in energy metabolism, such as fatty acid biosynthetic process and ATP synthesis, and those important in maintaining energy metabolic pathways, such as Ptgis, Pycr1 and Lsynal, SLC33A1 (Table 5). Ptgis mediates prostaglandin biosynthetic process and fatty acid biosynthetic process [34,62]. Pycr1 encodes an enzyme involved in the cellular response to oxidative stress and amino acid biosynthetic process [35]. The Pycr1 protein is located in the mitochondria—the “power houses” of the cell that provide energy for cell’s consumption [35]. Lsynal encodes a rate-limiting enzyme in the synthesis of all inositol-containing compounds [63]. SLC33A1 functions as an acetyl-CoA transporter that is required for the formation of O-acetylated (Ac) gangliosides [64,65]. These data indicate that *atrogin-1* plays an important role in regulating cardiomyocyte metabolic pathway.

It is well known that LPS directly induces inflammation in various cell types [1,2]. We then determine if *atrogin-1* inhibits LPS-induced proinflammatory response in cardiomyocytes. *Atrogin-1* overexpression markedly inhibited the expression of proinflammatory-related genes including IL-1 $\beta$ , IL-6, Lbp, Ptgis2 and Serpinb2, Cxcl1, Cxcl2 and Ccl20 in cardiomyocytes, but increased anti-inflammatory gene IL-1r1 expression compared to Ad-GFP control under basal condition or in response to LPS stimulation (Figure 5A, Table 5), whereas these effects were reversed by knockdown of *atrogin-1* by siRNA (Figure 5B, Table 5). These results indicate that increased expression of *atrogin-1* inhibits cardiomyocyte inflammation.

The MAPK and NF- $\kappa$ B signaling pathways have been identified as the crucial regulators of cardiomyocyte apoptosis, cardiac hypertrophy and inflammation in response to various injury [66], but it is unknown if *atrogin-1* affects activation of MAPK and NF- $\kappa$ B signal pathways in cardiomyocytes in response to LPS. Recently, a study demonstrated that depletion of *atrogin-1* inhibits cardiac hypertrophy in part through stabilization of I $\kappa$ B- $\alpha$  and inactivation of NF- $\kappa$ B [12]. To further investigate the mechanisms of *atrogin-1* in LPS-induced cardiac injury, we examined activation of ERK, JNK, p38 and p65/NF- $\kappa$ B signaling pathways. Under basal condition, overexpression of *atrogin-1* decreased the levels of ERK, JNK, p38 and p65/NF- $\kappa$ B phosphorylation compared with

Ad-GFP control (Figure 6A), suggesting that *atrogin-1* may be involved in regulation of MAPK and NF- $\kappa$ B activation. After stimulation of LPS, the levels of ERK, JNK, p38 and p65/NF- $\kappa$ B phosphorylation were markedly increased, whereas these effects were markedly attenuated by *atrogin-1* infection in cardiomyocytes (Figure 6A). In contrast, knockdown of endogenous *atrogin-1* in cardiomyocytes had opposite effects (Figure 6B). Thus, *atrogin-1* exerts its inhibitory effects on cardiomyocyte survival, hypertrophy and inflammation via inhibition of MAPKs and NF- $\kappa$ B pathways.

## Conclusion

The current study provides a comprehensive, global view of gene expression patterns induced by *atrogin-1* in the neonatal rat cardiomyocytes. Overexpression of *atrogin-1* results in marked alterations of gene expression profiles that are associated with cardiomyocyte survival, proliferation, inflammation, metabolism and hypertrophy, thereby leading to inhibition of cardiomyocyte survival, growth and hypertrophy under basal condition or in response to LPS stimulation. The mechanisms underlying these effects were associated with inactivation of MAPK (ERK, JNK and p38) and NF- $\kappa$ B signaling pathways. These results may provide novel insight into how *atrogin-1* modulates the programming of cardiac muscle gene expression.

## Materials and Methods

All procedures were approved by and performed in accordance with the Animal Care and Use Committee of Capital Medical University (20110820).

### Neonatal rat cardiomyocytes isolation and culture

Primary cardiomyocytes were prepared by enzymatic disassociation of 1- to 2-day old Sprague-Dawley rats as described previously [5]. The isolated cardiomyocytes were resuspended in fresh DMEM/F12 containing 10% fetal bovine serum (FBS) and 1% penicillin-streptomycin and were plated into the Laminin (Sigma) pre-coated dishes (Corning) and incubated for 24 h at 37°C, then cultured with serum-free DMEM/F12 in later experiments.

### Adenovirus Infection

Twenty-four hours after plating, neonatal rat cardiomyocytes were infected with various adenovirus vectors as indicated and cultured with serum-free DMEM/F12 for 24 hours. Recombinant adenoviruses expressing GFP alone (Ad-GFP), *atrogin-1* (Ad-*atrogin-1*-GFP), siRNA-control or siRNA-*atrogin-1* were generated using the AdEasy system (MP Biomedicals Inc.) as described previously [18]. Fluorescent images were collected on a fluorescence microscope (Nikon TE 2000-U, Japan). The infection efficiency of adenoviruses was determined by counting the number of cells with green fluorescent protein (GFP).

A

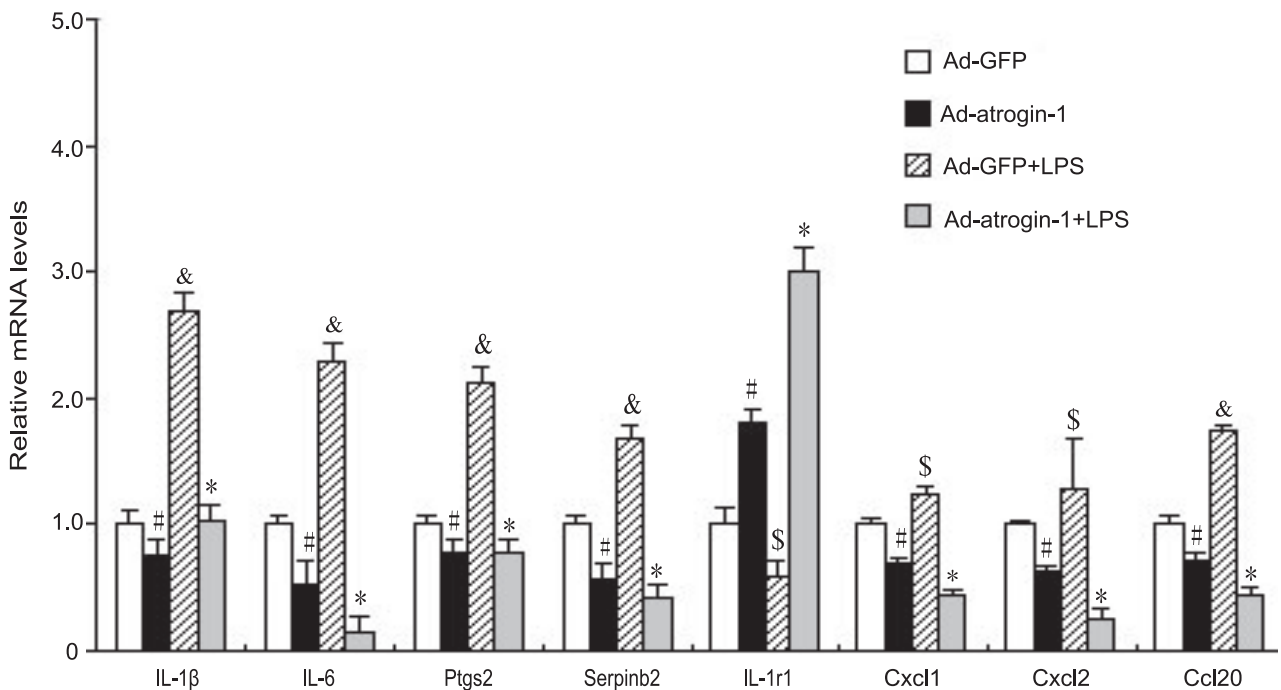

B

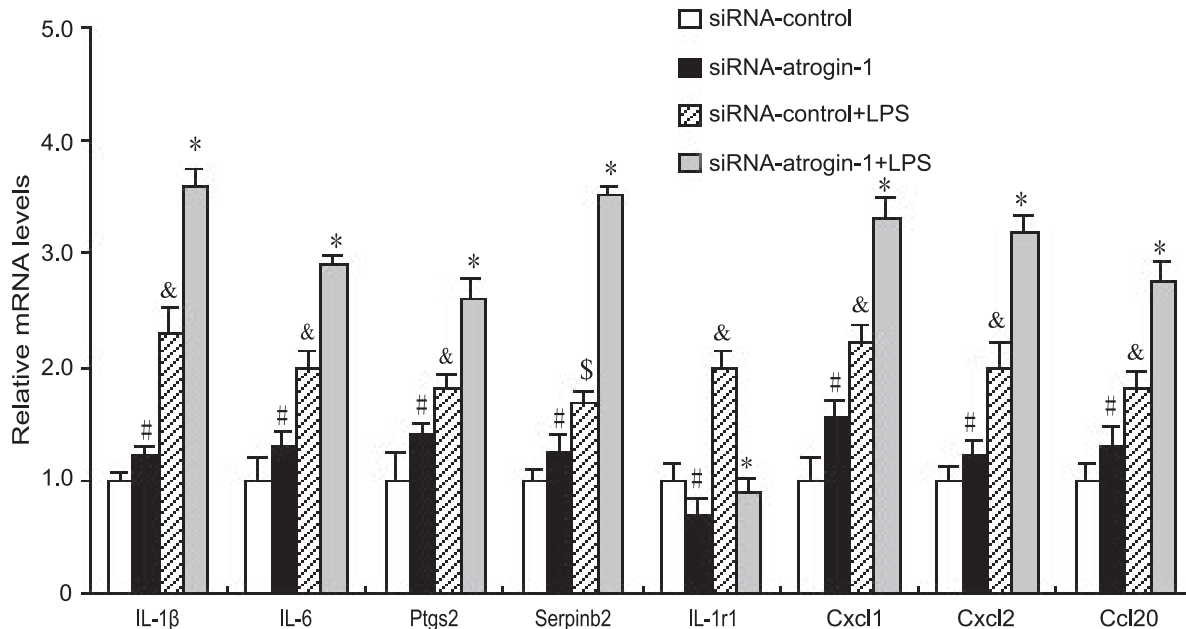

**Figure 5. Effect of *atrogin-1* on inflammation. A.** Neonatal rat cardiomyocytes were infected with Ad-GFP or Ad-*atrogin-1*-GFP for 24 h and then treated with LPS (1  $\mu$ g/ml) for additional 24 hours. The qRT-PCR analysis of gene expression was performed in triplicate using specific oligonucleotides primers. Data represent the mean  $\pm$  SEM. # $P$ <0.05, & $P$ <0.01, \$ $P$ <0.05 vs. Ad-GFP; \* $P$ <0.01 vs. Ad-GFP+LPS. **B.** Neonatal rat cardiomyocytes were infected with Ad-siRNA-control or Ad-siRNA-*atrogin-1* for 24 h and then treated with LPS (1  $\mu$ g/ml) for additional 24 hours. The qRT-PCR analysis of gene expression was performed as in A. Data represent the mean  $\pm$  SEM. # $P$ <0.05, & $P$ <0.01, \$ $P$ <0.05 vs. siRNA-control; \* $P$ <0.01 vs. Ad-siRNA+LPS.

doi:10.1371/journal.pone.0053831.g005

### RNA isolation and GeneChip processing

Total RNA was isolated with TRIzol (Invitrogen) from neonatal rat cardiomyocytes in three independent experiments according to manufacturer's instructions. The quantity and purity of all RNA

samples was determined using the Nanodrop ND-1000 spectrophotometer (Thermo Fisher, Waltham, MA, US), and RNA integrity was determined with the Bioanalyzer 2100 (Agilent technologies, Santa Clara, CA, US). Five micrograms of total

A

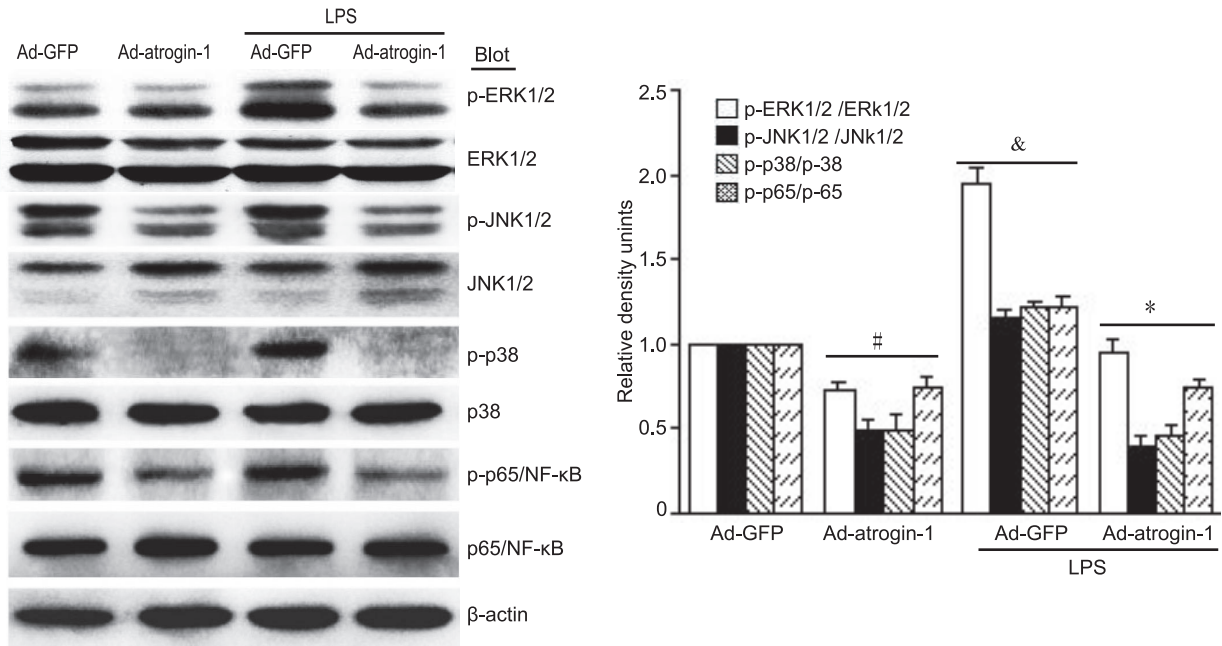

B

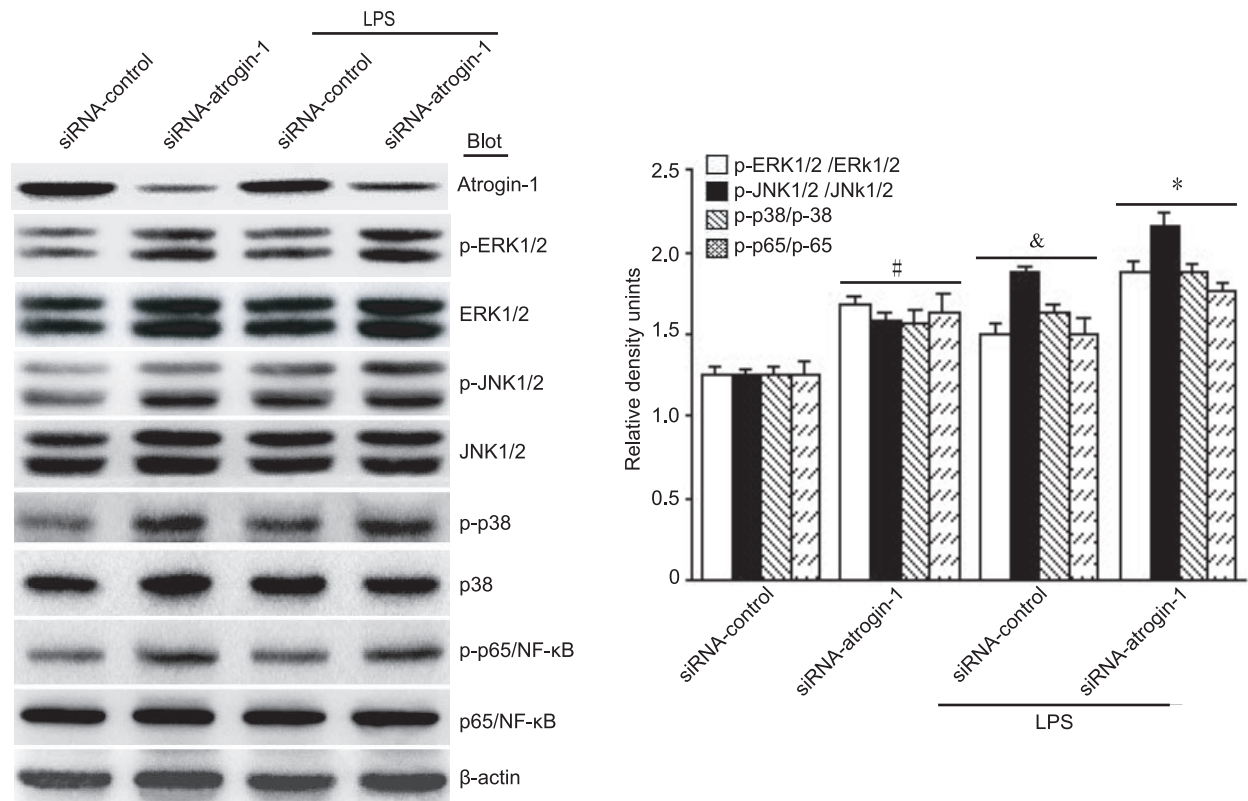

**Figure 6. Effects of *atrogin-1* on MAPK and NF- $\kappa$ B signaling pathways.** **A.** Neonatal rat cardiomyocytes were infected with Ad-GFP or Ad-atrogin-1-GFP for 24 h and then treated with LPS (1  $\mu$ g/ml). The protein levels of total and phospho-ERK1/2, JNK1/2, p38 and p65/NF- $\kappa$ B were detected by Western blot analysis (left panels). Quantitative analysis of relative intensity of phosphorylated proteins was shown (right panel). Data represent the mean  $\pm$  SEM (n=3). # $P$ <0.05, & $P$ <0.05 vs. Ad-GFP; \* $P$ <0.01 vs. Ad-GFP+LPS. **B.** Neonatal rat cardiomyocytes were infected with adenovirus siRNA-control or siRNA-atrogin-1 and then treated with LPS (1  $\mu$ g/ml). The protein levels were detected as in A (left panels). Quantitative analysis of relative intensity of phosphorylated proteins was shown (right panel). Data represent the mean  $\pm$  SEM (n=3). # $P$ <0.05, & $P$ <0.05 vs. siRNA-control; \* $P$ <0.05 vs. siRNA-control+LPS. doi:10.1371/journal.pone.0053831.g006

**Table 6.** Primers used for Quantitative realtime RT-PCR Analyses.

| Genes          | Forward primer                | Reverse primer                |
|----------------|-------------------------------|-------------------------------|
| Axin2          | 5'-GCGTGAGATCCACAGAAACG-3'    | 5'-TCGCTGGATAACTCGTGTC-3'     |
| Calr           | 5'-CCGATGCGAATATCTATGCC-3'    | 5'-TCATTGCCAAACTCCTCTGC-3'    |
| Dkk2           | 5'-CATGAACCAAGGACTGGCTT-3'    | 5'-CAGGCTGAAGATCCTTGGTG-3'    |
| Il1r1          | 5'-TTGTCTCATTGTGCCTCTGC-3'    | 5'-TAAGAGGACAGCTGCGAATG-3'    |
| CyclinD2       | 5'-TCAAGTGCCTGCAGAAGGAC-3'    | 5'-TGGCCAGAGGAAAGACCTCT-3'    |
| MMP3           | 5'-TCCTTCGATGCAGTCAGCAC-3'    | 5'-TGTTGGATGGAAGAGACGGC-3'    |
| Cadm1          | 5'-CACAGGTGATGGGCAGAATC-3'    | 5'-TGCCTGTTGGGTTCTAGTAG-3'    |
| Cxxl1          | 5'-CCACACTCAAGAATGGTCGC-3'    | 5'-GTTACCAGACAGACGCCAT-3'     |
| Cxcl2          | 5'-TTTGTCTCAACCCTGAAGCC-3'    | 5'-TGAGGTACAGGAGCCCATGT-3'    |
| Cxcl6          | 5'-TCCTGCTCGTCATTCACCT-3'     | 5'-CAAACACAGCGTAGCTCCGT-3'    |
| Il-6           | 5'-TCTGCTCTGGTCTCTGGAG-3'     | 5'-TTGCTCTGAATGACTCTGGC-3'    |
| Il-1 $\beta$   | 5'-CTCTGTGACTCGTGGGATGATG-3'  | 5'-CCACTTGTGGCTTATGTCTGTC-3'  |
| Ptgs2          | 5'-GATCACATTTGATTGACAGC-3'    | 5'-TCCTTATTTCTTTACACC-3'      |
| Serpib2        | 5'-TCCTGGTGCTCAGGCTAAC-3'     | 5'-CAGCCATGGAAGTTCTCTGG-3'    |
| Ccl20          | 5'-ACCTCTCAGCCTAAGAACCAAGA-3' | 5'-TGTGCAGTGATGTGCAAGTGAAC-3' |
| Myh7           | 5'-CGAGGCAAGCTCACGTATAC-3'    | 5'-CTTGGCTTCTGTTCTCTCT-3'     |
| ANF            | 5'-CTTCTCCATCACCAAGGGCTT-3'   | 5'-GGATTGCTCCAATATGGCT-3'     |
| serca2         | 5'-CAGTTCATCCGCTACCTCATCC-3'  | 5'-CGCAGTGGCAGGACAGCC-3'      |
| GADPH          | 5'-CCCCAATGTATCCGTTGTG        | TAGCCAGGATGCCCTTATG           |
| $\beta$ -actin | 5'-GGAGATTACTGCCTGGCTCTA-3'   | 5'-GACTCATGTACTCTGCTTCTG-3'   |

doi:10.1371/journal.pone.0053831.t006

RNA was amplified with the GeneChip One-Cycle cDNA synthesis Kit (Affymetrix) and GeneChip IVT labeling Kit (Affymetrix). Fifteen micrograms biotin-labeled complementary RNA (cRNA) was fractionated and hybridized to Affymetrix GeneChip Rat Genome 230 2.0 array according to the manufacturer's instructions. After 16 h of hybridization, the Gene Chips were washed and stained on a Fluidics Station 450 (Affymetrix) and scanned in a confocal scanner (Affymetrix GeneChip Scanner 3000) according to the Affymetrix GeneChip Expression Analysis Manual as described previously [67]. On the GeneChip Rat Genome 230 2.0 array, 31,000 probe sets analyze the expression of 30,000 transcripts representing 28,000 known genes.

### Microarray data analysis

Analysis of microarray data was performed as described previously [67]. Briefly, raw intensities from the CEL files were analyzed using GeneSpring GX 11.0 (Agilent Technologies) to generate robust multi-array average (RMA) intensity in  $\log_2$  scale for each probe set. Differentially expressed genes in Ad-*atrogin-1*-GFP group compared to Ad-GFP control group were detected with two statistical tests, a statistical technique used to compare means of two samples implemented in GeneSpring GX 11.0. For each transcript, fold change, statistical significance of differential expression and false discovery rate (FDR) were calculated. Fold change was calculated using the average signal from each experimental group. The recovered P-values of the comparisons were then corrected using a step-up false negative/positive rate value of 5%. The resulting list of significantly differentially expressed genes was filtered to include only genes that demonstrated 2-fold or greater up- or down-regulation. To search for enrichment of specific biological processes, the genes showing significantly differential expression between the two groups were classified into functional groups according to GO (Gene

Ontology). As input, the differentially regulated probe sets from the comparison were used. As output, significant processes (GOTERM) with fold changes  $\geq 2$ -fold or  $\leq -2$ -fold were generated. Furthermore, pathway analysis for the comparison was conducted through the use of KEGG Pathways database, which is a bioinformatics resource for linking genomes to life and the environment. Details can be found at <http://www.genome.jp/kegg/>. The microarray data discussed in this publication have been deposited in NCBI's Gene Expression Omnibus and are accessible through GEO Series accession number GSE31117 (<http://www.ncbi.nlm.nih.gov/geo/query/acc.cgi?acc=GSE31117>).

### Real-time quantitative PCR analysis

Microarray results for the expression profiling experiments were verified by real-time quantitative RT-PCR (qRT-PCR) using a Bio-Rad iQ5 Real-Time PCR detection system, employing  $\beta$ -actin as the endogenous control gene as described previously [67]. All reactions were conducted in triplicates and the data was analyzed using the delta delta Ct ( $\Delta\Delta$ Ct) method [68]. Oligonucleotide primers for qRT-PCR were designed using the Primer 5.0 software and the primers were designed to span large introns to eliminate possible contaminating genomic DNA. Rat gene-specific oligonucleotide primers used for qRT-PCR analyses are listed in Table 6.

### Western blot analysis

Cardiomyocytes were lysed in lysis buffer (50 mM Tris-HCl, pH 7.5, 1 mM DTT, 150 mM NaCl, 0.5% NP-40, 1 mM EDTA, 1 mM PMSF, 1 mM Na<sub>3</sub>VO<sub>4</sub>, 1 mM NaF, plus protease inhibitor cocktail). Forty micrograms of total proteins was separated by SDS-PAGE, transferred to PVDF membranes (Millipore), and analyzed by western blot with anti-*atrogin-1* antibody (H300, Santa Cruz) as described previously [5], using  $\beta$ -

actin (I-19, Santa Cruz) as the internal control. Protein levels were quantified by using Gel-pro 4.5 Analyzer (Media Cybernetics).

### TUNEL assays

Primary cardiomyocytes were infected with Ad-*atrogin-1* or Ad-GFP control (MOI = 10) for 24 hours and then treated with 10 ng/ml LPS (Sigma) for 24 hours. TUNEL assays were performed using the In Situ Cell Death Detection Kit, TMR red (Roche) according to manufacturer's instructions. Apoptosis was evaluated by Laser scanning confocal fluorescence microscope (Leica TCS SP2, Germany). Quantitation of cardiomyocyte apoptosis was performed based on the percentage of TMR red labeled nuclei with image-pro plus 6.0 software.

### Measurement of cardiomyocyte hypertrophy

Primary cardiomyocytes were infected with Ad-*atrogin-1* or Ad-GFP control (MOI = 10) for 24 hours and then treated with PBS or lipopolysaccharides (LPS, 1  $\mu$ g/ml) for 8 hours, then cells were fixed and stained with anti- $\alpha$ -actinin antibody followed by Alexa

Fluor 568-conjugated goat anti-mouse IgG (red), and nuclei were stained with DAPI (blue). A representative field is shown for each condition. A minimum of 100 randomly chosen cells measured in each group. Quantitation of cell surface area was performed as described previously [5].

### Statistical analysis

Data for qRT-PCR analyses were presented as means  $\pm$  SEM. Differences between groups were evaluated for statistical significance using a two-tailed Student's *t* test with GraphPad Prism 5.0 or Stata/SE 10.0 softwares. *P* values less than 0.05 were regarded as significant.

### Author Contributions

Conceived and designed the experiments: HHL, JD, CST. Performed the experiments: YZ, HXW, SBG, HY, XJZ. Analyzed the data: YZ, HXW, HY, QF. Contributed reagents/materials/analysis tools: HHL, JD, YZ, QF. Wrote the paper: HHL, JD.

### References

- Alexander C, Rietschel ET (2001) Bacterial lipopolysaccharides and innate immunity. *Journal of endotoxin research* 7:167–202.
- Frantz S, Kobzik L, Kim YD, Fukazawa R, Medzhitov R, et al. (1999) Toll4 (TLR4) expression in cardiac myocytes in normal and failing myocardium. *The Journal of clinical investigation* 104:271–280.
- Suzuki J, Bayna E, Li HL, Molle ED, Lew WY (2007) Lipopolysaccharide activates calcineurin in ventricular myocytes. *Journal of the American College of Cardiology* 49:491–499.
- Willis MS, Townley-Tilson WH, Kang EY, Homeister JW, Patterson C (2010) Sent to destroy: the ubiquitin proteasome system regulates cell signaling and protein quality control in cardiovascular development and disease. *Circ Res* 106:463–478.
- Li HH, Kedar V, Zhang C, McDonough H, Arya R, et al. (2004) Atrogin-1/muscle atrophy F-box inhibits calcineurin-dependent cardiac hypertrophy by participating in an SCF ubiquitin ligase complex. *The Journal of clinical investigation* 114:1058–1071.
- Li HH, Willis MS, Lockyer P, Miller N, McDonough H, et al. (2007) Atrogin-1 inhibits Akt-dependent cardiac hypertrophy in mice via ubiquitin-dependent coactivation of Forkhead proteins. *The Journal of clinical investigation* 117:3211–3223.
- Zhang Y, Kang YM, Tian C, Zeng Y, Jia LX, et al. (2011) Overexpression of *Nrdp1* in the heart exacerbates doxorubicin-induced cardiac dysfunction in mice. *PLoS one* 6:e21104.
- Adams V, Linke A, Wisloff U, Doring C, Erbs S, et al. (2007) Myocardial expression of *Murf-1* and *MAFbx* after induction of chronic heart failure: Effect on myocardial contractility. *Cardiovasc Res* 73:120–129.
- Gomes MD, Lecker SH, Jagoe RT, Navon A, Goldberg AL (2001) Atrogin-1, a muscle-specific F-box protein highly expressed during muscle atrophy. *Proc Natl Acad Sci U S A* 98:14440–14445.
- Bodine SC, Latres E, Baumhueter S, Lai VK, Nunez L, et al. (2001) Identification of ubiquitin ligases required for skeletal muscle atrophy. *Science* 294:1704–1708.
- Arya R, Kedar V, Hwang JR, McDonough H, Li HH, et al. (2004) Muscle ring finger protein-1 inhibits PKC $\{\epsilon\}$  activation and prevents cardiomyocyte hypertrophy. *The Journal of cell biology* 167:1147–1159.
- Usui S, Maejima Y, Pain J, Hong C, Cho J, et al. (2011) Endogenous Muscle Atrophy F-Box Mediates Pressure Overload-Induced Cardiac Hypertrophy Through Regulation of Nuclear Factor- $\{\kappa\}$ B. *Circ Res* 109:161–171.
- Glass DJ (2005) Skeletal muscle hypertrophy and atrophy signaling pathways. *Int J Biochem Cell Biol* 37:1974–1984.
- Li YP, Chen Y, John J, Moylan J, Jin B, et al. (2005) TNF- $\alpha$  acts via p38 MAPK to stimulate expression of the ubiquitin ligase atrogin1/MAFbx in skeletal muscle. *Faseb J* 19:362–370.
- Sandri M, Sandri C, Gilbert A, Skurk C, Calabria E, et al. (2004) Foxo transcription factors induce the atrophy-related ubiquitin ligase atrogin-1 and cause skeletal muscle atrophy. *Cell* 117:399–412.
- Csibi A, Leibovitch MP, Cornille K, Tintignac LA, Leibovitch SA (2009) MAFbx/Atrogin-1 controls the activity of the initiation factor eIF3-f in skeletal muscle atrophy by targeting multiple C-terminal lysines. *J Biol Chem* 284:4413–4421.
- Tintignac LA, Lagirand J, Batonnet S, Sirri V, Leibovitch MP, et al. (2005) Degradation of MyoD mediated by the SCF (MAFbx) ubiquitin ligase. *J Biol Chem* 280:2847–2856.
- Xie P, Guo S, Fan Y, Zhang H, Gu D, et al. (2009) Atrogin-1/MAFbx enhances simulated ischemia/reperfusion-induced apoptosis in cardiomyocytes through degradation of MAPK phosphatase-1 and sustained JNK activation. *J Biol Chem* 284:5488–5496.
- Lagirand-Cantaloube J, Offner N, Csibi A, Leibovitch MP, Batonnet-Pichon S, et al. (2008) The initiation factor eIF3-f is a major target for atrogin1/MAFbx function in skeletal muscle atrophy. *Embo J* 27:1266–1276.
- Skurk C, Izumiya Y, Maatz H, Razeghi P, Shiojima I, et al. (2005) The FOXO3a transcription factor regulates cardiac myocyte size downstream of AKT signaling. *The Journal of biological chemistry* 280:20814–20823.
- Galasso G, De Rosa R, Piscione F, Iaccarino G, Vosa C, et al. (2010) Myocardial expression of FOXO3a-Atrogin-1 pathway in human heart failure. *Eur J Heart Fail* 12:1290–1296.
- Eisen MB, Spellman PT, Brown PO, Botstein D (1998) Cluster analysis and display of genome-wide expression patterns. *Proc Natl Acad Sci U S A* 95:14863–14868.
- Choi JK, Kim KH, Park H, Park SR, Choi BH (2011) Granulocyte macrophage-colony stimulating factor shows anti-apoptotic activity in neural progenitor cells via JAK/STAT5-Bcl-2 pathway. *Apoptosis* 16:127–134.
- Kovacic JC, Muller DW, Graham RM (2007) Actions and therapeutic potential of G-CSF and GM-CSF in cardiovascular disease. *J Mol Cell Cardiol* 42:19–33.
- Loureiro B, Oliveira LJ, Favoreto MG, Hansen PJ (2011) Colony-stimulating Factor 2 Inhibits Induction of Apoptosis in the Bovine Preimplantation Embryo. *Am J Reprod Immunol*.
- Liu Y, Li PK, Li C, Lin J (2010) Inhibition of STAT3 signaling blocks the anti-apoptotic activity of IL-6 in human liver cancer cells. *J Biol Chem* 285:27429–27439.
- Fredj S, Bescond J, Louault C, Delwail A, Lecron JC, et al. (2005) Role of interleukin-6 in cardiomyocyte/cardiac fibroblast interactions during myocyte hypertrophy and fibroblast proliferation. *J Cell Physiol* 204:428–436.
- Ancey C, Corbi P, Froger J, Delwail A, Wijdenes J, et al. (2002) Secretion of IL-6, IL-11 and LIF by human cardiomyocytes in primary culture. *Cytokine* 18:199–205.
- Moreb JS, Baker HV, Chang LJ, Amaya M, Lopez MC, et al. (2008) ALDH isozymes downregulation affects cell growth, cell motility and gene expression in lung cancer cells. *Mol Cancer* 7:87.
- Wu LY, Li M, Hinton DR, Guo L, Jiang S, et al. (2003) Microphthalmia resulting from MSX2-induced apoptosis in the optic vesicle. *Invest Ophthalmol Vis Sci* 44:2404–2412.
- Yu HM, Liu B, Costantini F, Hsu W. (2007) Impaired neural development caused by inducible expression of Axin in transgenic mice. *Mech Dev* 124:146–156.
- Baba Y, Noshio K, Shima K, Goessling W, Chan AT, et al. (2010) PTGER2 overexpression in colorectal cancer is associated with microsatellite instability, independent of CpG island methylator phenotype. *Cancer Epidemiol Biomarkers Prev* 19:822–831.
- Lee SJ, Kim JY, Nogueiras R, Linares JF, Perez-Tilve D, et al. (2010) PKC $\zeta$ -regulated inflammation in the nonhematopoietic compartment is critical for obesity-induced glucose intolerance. *Cell Metab* 12:65–77.
- Nakayama T (2010) Genetic polymorphisms of prostacyclin synthase gene and cardiovascular disease. *Int Angiol* 29:33–42.
- Reversade B, Escande-Beillard N, Dimopoulou A, Fischer B, Chng SC, et al. (2009) Mutations in PYCR1 cause cutis laxa with progeroid features. *Nat Genet* 41:1016–1021.
- Kwon S, Kim D, Rhee JW, Park JA, Kim DW, et al. (2010) ASB9 interacts with ubiquitous mitochondrial creatine kinase and inhibits mitochondrial function. *BMC Biol* 8:23.

37. Carniel E, Taylor MR, Sinagra G, Di Lenarda A, Ku L, et al. (2005) Alpha-myosin heavy chain: a sarcomeric gene associated with dilated and hypertrophic phenotypes of cardiomyopathy. *Circulation* 112:54–59.
38. Luo X, Shin DM, Wang X, Koniczny SF, Muallem S (2005) Aberrant localization of intracellular organelles, Ca<sup>2+</sup> signaling, and exocytosis in *Mist1* null mice. *J Biol Chem* 280:12668–12675.
39. Andersson KB, Birkeland JA, Finsen AV, Louch WE, Sjaastad I, et al. (2009) Moderate heart dysfunction in mice with inducible cardiomyocyte-specific excision of the *Serca2* gene. *J Mol Cell Cardiol* 47:180–187.
40. Niwano K, Arai M, Koitabashi N, Watanabe A, Ikeda Y, et al. (2008) Lentiviral vector-mediated *SERCA2* gene transfer protects against heart failure and left ventricular remodeling after myocardial infarction in rats. *Mol Ther* 16:1026–1032.
41. Lantz KA, Vatamaniuk MZ, Brestelli JE, Friedman JR, Matschinsky FM, et al. (2004) *Foxa2* regulates multiple pathways of insulin secretion. *J Clin Invest* 114:512–520.
42. Li M, Georgakopoulos D, Lu G, Hester L, Kass DA, et al. (2005) p38 MAP kinase mediates inflammatory cytokine induction in cardiomyocytes and extracellular matrix remodeling in heart. *Circulation* 111:2494–2502.
43. Tsuchiya H, Oka T, Nakamura K, Ichikawa A, Saper CB, et al. (2008) Prostaglandin E2 attenuates preoptic expression of GABAA receptors via EP3 receptors. *J Biol Chem* 283:11064–11071.
44. Heinzelmann M, Bosshart H (2005) Heparin binds to lipopolysaccharide (LPS)-binding protein, facilitates the transfer of LPS to CD14, and enhances LPS-induced activation of peripheral blood monocytes. *J Immunol* 174:2280–2287.
45. Sun H, Xu B, Inoue H, Chen QM (2008) P38 MAPK mediates COX-2 gene expression by corticosterone in cardiomyocytes. *Cell Signal* 20:1952–1959.
46. Feng L (2000) Role of chemokines in inflammation and immunoregulation. *Immunol Res* 21:203–210.
47. Moser B, Willmann K. (2004) Chemokines: role in inflammation and immune surveillance. *Ann Rheum Dis* 63 Suppl 2:ii84–ii89.
48. Gonzalez-Navajas JM, Law J, Nguyen KP, Bhargava M, Corr MP, et al. (2010) Interleukin 1 receptor signaling regulates DUBA expression and facilitates Toll-like receptor 9-driven antiinflammatory cytokine production. *J Exp Med* 207:2799–2807.
49. Liu CJ, Cheng YC, Lee KW, Hsu HH, Chu CH, et al. (2008) Lipopolysaccharide induces cellular hypertrophy through calcineurin/NFAT-3 signaling pathway in H9c2 myocardial cells. *Molecular and cellular biochemistry* 313:167–178.
50. Rose BA, Force T, Wang Y (2010) Mitogen-activated protein kinase signaling in the heart: angels versus demons in a heart-breaking tale. *Physiol Rev* 90:1507–1546.
51. Jin B, Li YP (2007) Curcumin prevents lipopolysaccharide-induced atrogin-1/MAFbx upregulation and muscle mass loss. *Journal of cellular biochemistry* 100:960–969.
52. Li YP, Lecker SH, Chen Y, Waddell ID, Goldberg AL, et al. (2003) TNF-alpha increases ubiquitin-conjugating activity in skeletal muscle by up-regulating UbcH2/E220k. *Faseb J* 17:1048–1057.
53. Yamamoto Y, Hoshino Y, Ito T, Nariai T, Mohri T, et al. (2008) Atrogin-1 ubiquitin ligase is upregulated by doxorubicin via p38-MAP kinase in cardiac myocytes. *Cardiovascular research* 79:89–96.
54. Yoshida T, Semprun-Prieto L, Sukhanov S, Delafontaine P (2010) IGF-1 prevents ANG II-induced skeletal muscle atrophy via Akt- and Foxo-dependent inhibition of the ubiquitin ligase atrogin-1 expression. *American journal of physiology* 298:H1565–1570.
55. Li JJ, Zhang TP, Meng Y, Du J, Li HH (2011) Stability of F-box protein atrogin-1 is regulated by p38 mitogen-activated protein kinase pathway in cardiac H9c2 cells. *Cell Physiol Biochem* 27:463–470.
56. Baines CP, Molkenkin JD (2005) STRESS signaling pathways that modulate cardiac myocyte apoptosis. *J Mol Cell Cardiol* 38:47–62.
57. Jho EH, Zhang T, Domon C, Joo CK, Freund JN, et al. (2002) Wnt/beta-catenin/Tcf signaling induces the transcription of *Axin2*, a negative regulator of the signaling pathway. *Mol Cell Biol* 22:1172–1183.
58. Lee S, Lynn EG, Kim JA, Quon MJ (2008) Protein kinase C-zeta phosphorylates insulin receptor substrate-1, -3, and -4 but not -2: isoform specific determinants of specificity in insulin signaling. *Endocrinology* 149:2451–2458.
59. Martin P, Duran A, Minguet S, Gaspar ML, Diaz-Meco MT, et al. (2002) Role of zeta PKC in B-cell signaling and function. *Embo J* 21:4049–4057.
60. Chen W, Frangogiannis NG (2010) The role of inflammatory and fibrogenic pathways in heart failure associated with aging. *Heart failure reviews* 15:415–422.
61. Lusis AJ, Attie AD, Reue K. (2008) Metabolic syndrome: from epidemiology to systems biology. *Nature reviews* 9:819–830.
62. Gross S, Tilly P, Hentsch D, Vonesch JL, Fabre JE (2007) Vascular wall-produced prostaglandin E2 exacerbates arterial thrombosis and atherothrombosis through platelet EP3 receptors. *J Exp Med* 204:311–320.
63. Seelan RS, Lakshmanan J, Casanova MF, Parthasarathy RN (2009) Identification of myo-inositol-3-phosphate synthase isoforms: characterization, expression, and putative role of a 16-kDa gamma(c) isoform. *J Biol Chem* 284:9443–9457.
64. Kanamori A, Nakayama J, Fukuda MN, Stallcup WB, Sasaki K, et al. (1997) Expression cloning and characterization of a cDNA encoding a novel membrane protein required for the formation of O-acetylated ganglioside: a putative acetyl-CoA transporter. *Proc Natl Acad Sci U S A* 94:2897–2902.
65. Lin P, Li J, Liu Q, Mao F, Qiu R, et al. (2008) A missense mutation in SLC33A1, which encodes the acetyl-CoA transporter, causes autosomal-dominant spastic paraplegia (SPG42). *Am J Hum Genet* 83:752–759.
66. Michel MC, Li Y, Heusch G (2001) Mitogen-activated protein kinases in the heart. *Naunyn Schmiedebergs Arch Pharmacol* 363:245–266.
67. Yang D, Zeng Y, Tian C, Liu J, Guo SB, et al. (2010) Transcriptomic analysis of mild hypothermia-dependent alterations during endothelial reperfusion injury. *Cell Physiol Biochem* 25:605–614.
68. Livak KJ, Schmittgen TD (2001) Analysis of relative gene expression data using real-time quantitative PCR and the 2<sup>-ΔΔC<sub>T</sub></sup> Method. *Methods* 25:402–408.
